# Supplementary material for: Composition and diversity of gut microbiota in Pomacea canaliculata in sexes and between developmental stages
Source: PubMed Central journal article supplement (PMC8252327; doi:10.1186/s12866-021-02259-2), 2021-07-02

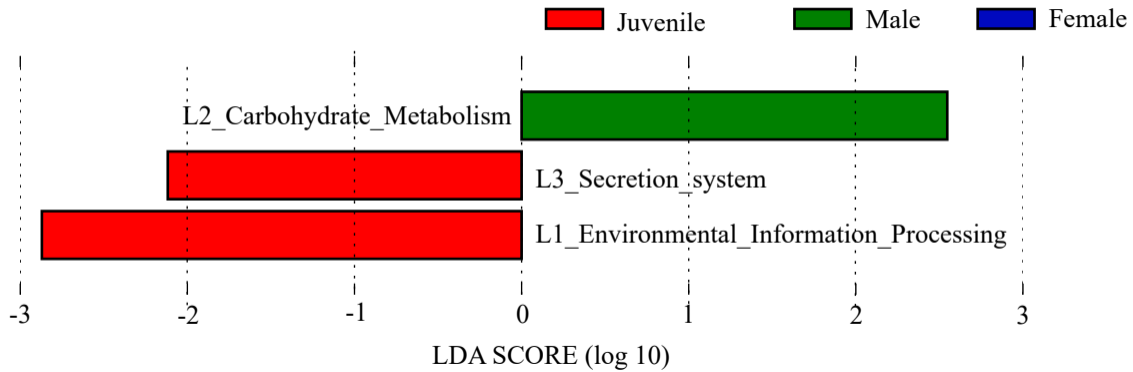

Supplement: 12866_2021_2259_MOESM5_ESM.pdf [file 12866_2021_2259_MOESM5_ESM.pdf]
